# Supplementary material for: Anti-Cancer Potential of MAPK Pathway Inhibition in Paragangliomas–Effect of Different Statins on Mouse Pheochromocytoma Cells
Source: PLoS One. 2014 May 20;9(5):e97712. doi: 10.1371/journal.pone.0097712 (PMC4028222; doi:10.1371/journal.pone.0097712)
Supplement: Table S1 — Sample numbers from Figure 1A with corresponding Chip Identifiers and sample identifiers from Shankavaram & Fliedner et al. 2013 Neoplasia 15: 435–447. Patient information and link to deposited microarray data are given in the original article. (XLSX) [file pone.0097712.s001.xlsx]

## Sheet: TableS1.txt
Number	Chip_ID	Sample Identifier
1	PKh_36	22B
2	PKh_39	24B
3	PKh_13	11B
4	PKh_50	46V
5	PKh_21	15B
6	PKh_32	19B
7	PKh_22	16B
8	PKh_33	20B
9	PKh_38	23B
10	PKh_27	17-1B
11	PKh_28	17-2B
12	PKh_11	10B
13	PKh_20	14B
14	PKh_24	31-1D_AT
15	PKh_26	33D_AT
16	PKh_35	35-1D_AT
17	PKh_08	29D_AT
18	PKh_09	30D_AT
19	PKh_18	12B
20	PKh_02	28D_HN
21	PKh_34	21B
22	PKh_41	35-2D_AT
23	PKh_10	09B
24	PKh_43	06N
25	PKh_42	05N
26	PKh_44	07N
27	PKh_05	03N
28	PKh_06	04-1N
29	PKh_07	04-2N
30	PKh_03	01N
31	PKh_04	02N
32	PKh_55	37-1V
33	PKh_54	38V
34	PKh_45	41V
35	PKh_57	36V
36	PKh_52	40V
37	PKh_47	43V
38	PKh_49	45V
39	PKh_40	08B
40	PKh_51	47V
41	PKh_46	42V
42	PKh_48	44V
43	PKh_25	31-2D_HN
44	PKh_58	32D_HN
45	PKh_37	25D_HN
46	PKh_53	39V
47	PKh_56	37-2V
48	PKh_60	26D_HN
49	PKh_29	31-3D_HN
50	PKh_01	27D_HN
51	PKh_59	34D_HN
52	PKh_19	13B
53	PKh_31	18B
